# Supplementary material for: Further studies of the Enhanced Structural Carborane Effect: tricarbonylruthenium and related derivatives of benzocarborane, dihydrobenzocarborane and biphenylcarborane
Source: Royal Society of Chemistry journal article supplement (doi:10.1039/c6dt01888b), 2016-01-01

**Further studies of the Enhanced Structural Carborane Effect: Tricarbonylruthenium and related derivatives of benzocarborane, dihydrobenzocarborane and biphenylcarborane**

Samuel L. Powley, Georgina M. Rosair and Alan J. Welch\*

**Electronic Supplementary Information**

NMR spectra of compounds **1-8** (in CDCl<sub>3</sub>) and [HNMe<sub>3</sub>]**IV** [in (CD<sub>3</sub>)<sub>2</sub>CO] are presented.

All spectra recorded at room temperature.

In the <sup>1</sup>H spectra are residual protio solvent and sometimes traces of impurities. In those spectra recorded in CDCl<sub>3</sub> these are δ 7.26 = solvent; δ 5.30 = DCM; δ 1.54 = H<sub>2</sub>O; δ 0.07 = grease. In the spectrum recorded in (CD<sub>3</sub>)<sub>2</sub>CO the resonance at δ 2.05 is solvent.

# Compound 1

$^1\text{H}$

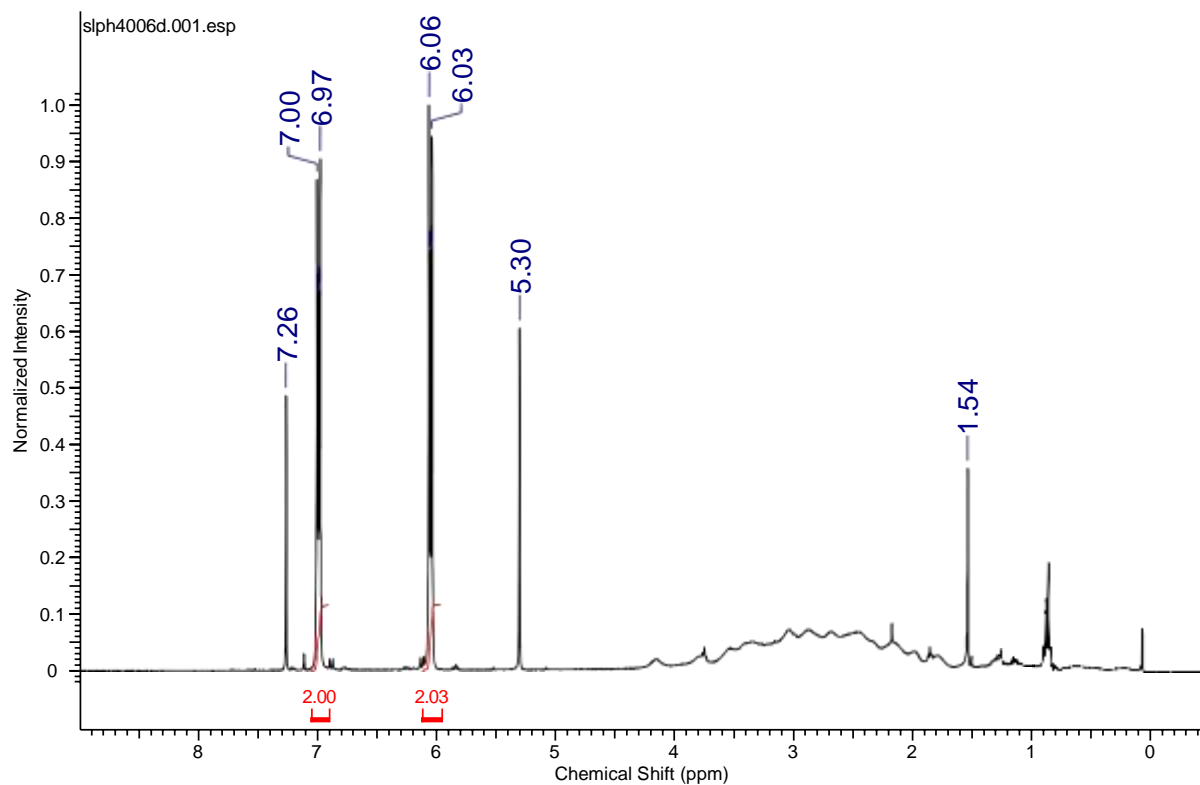

$^{11}\text{B}$

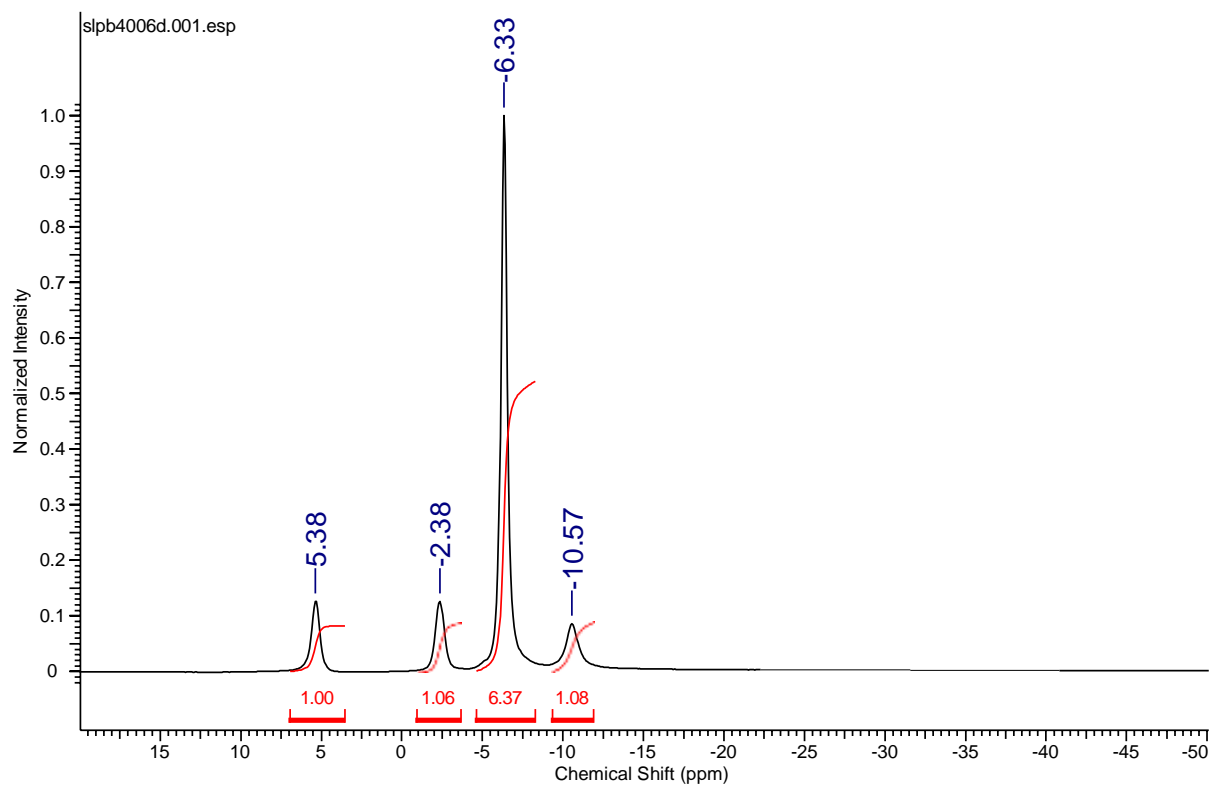

# Compound 2

$^1\text{H}$

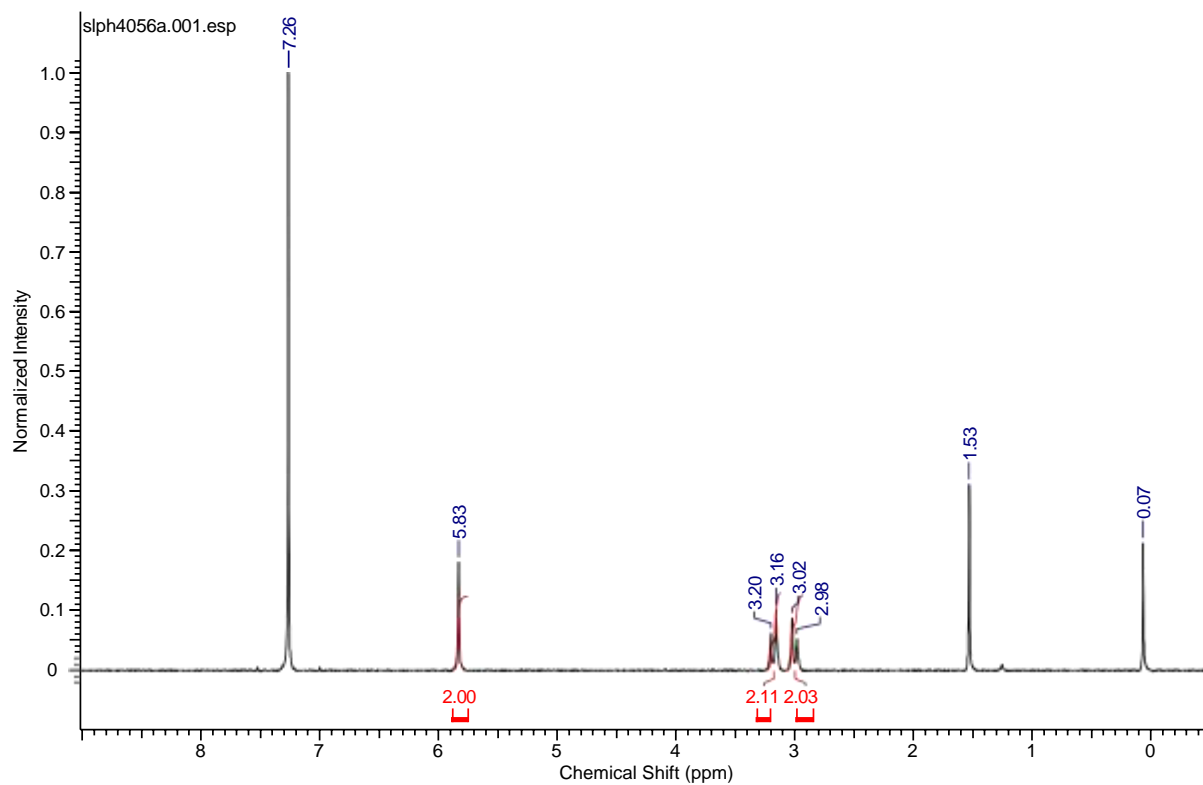

$^{13}\text{C}$

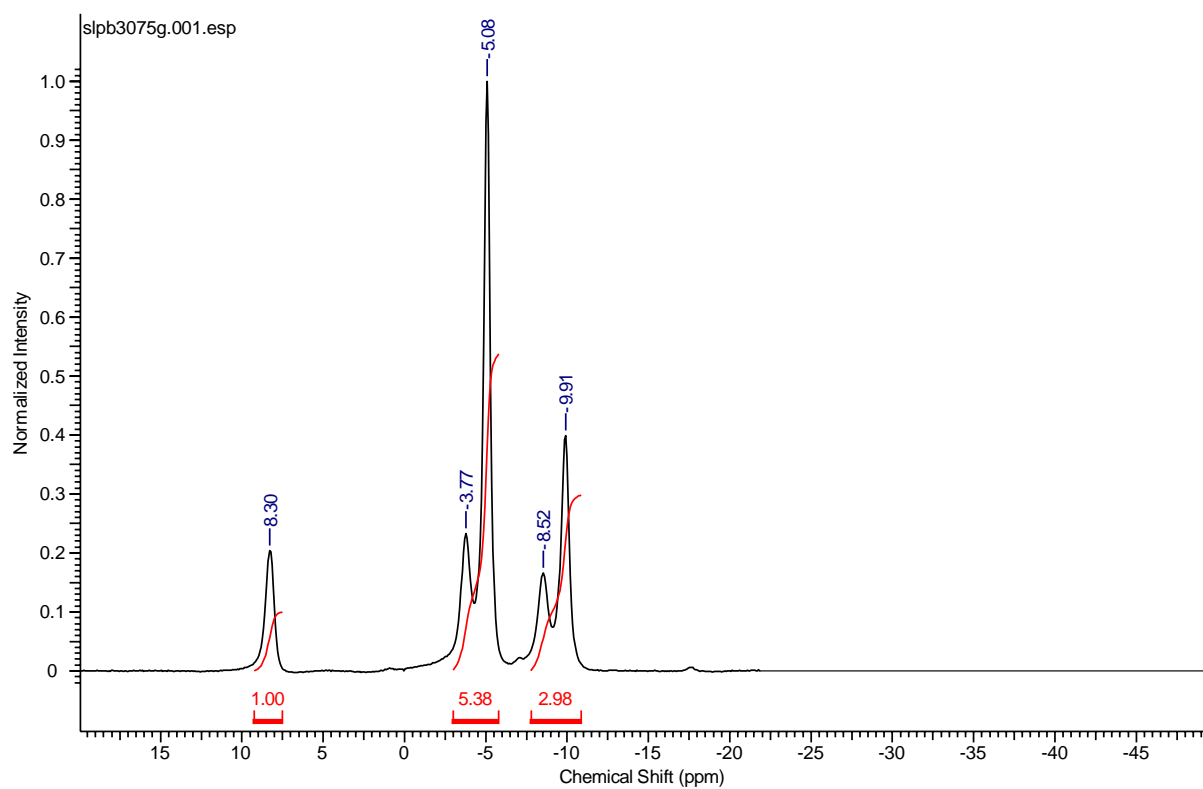

# Compound 3

$^1\text{H}$

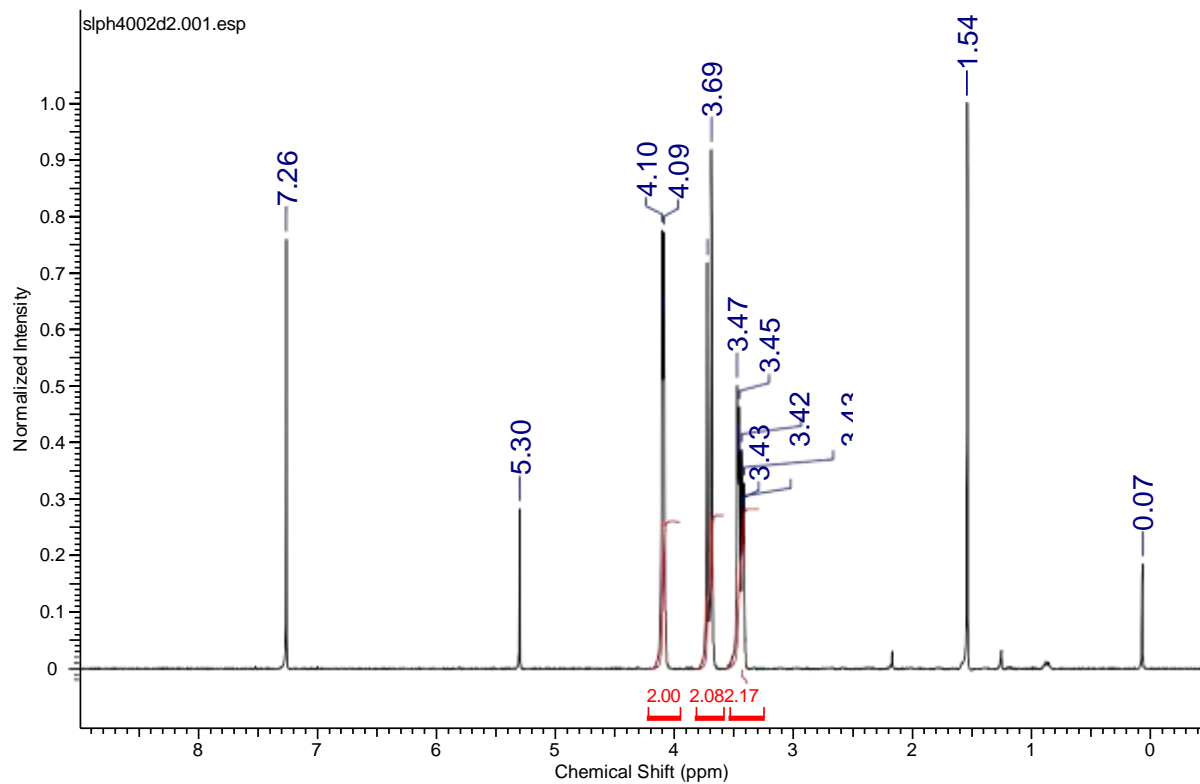

$^{11}\text{B}$

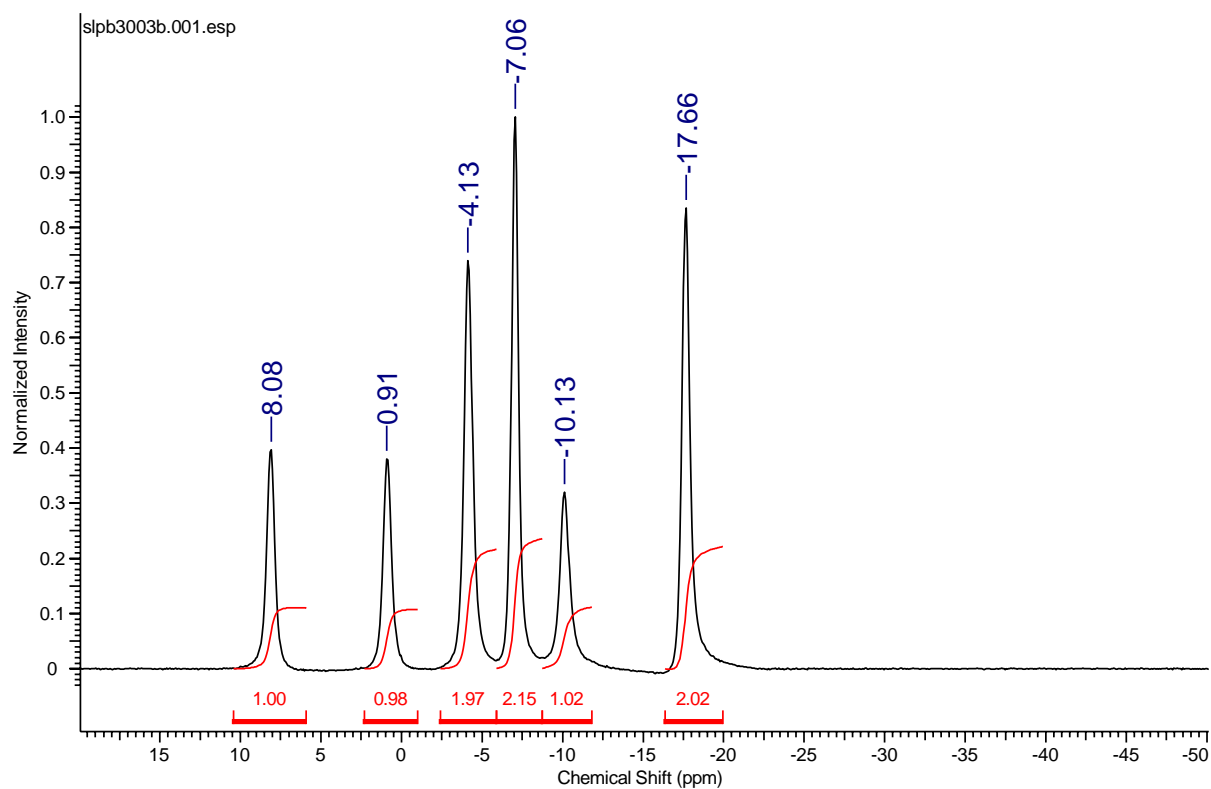

# Compound 4

$^1\text{H}$

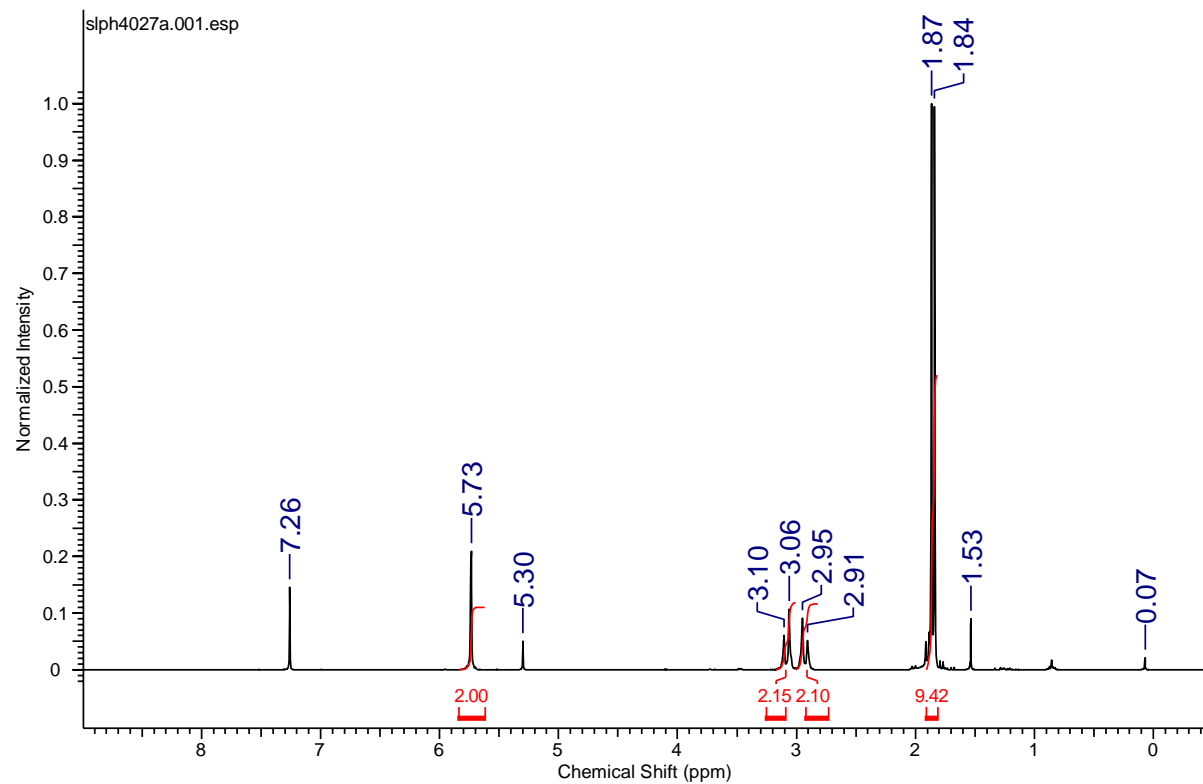

$^{13}\text{C}$

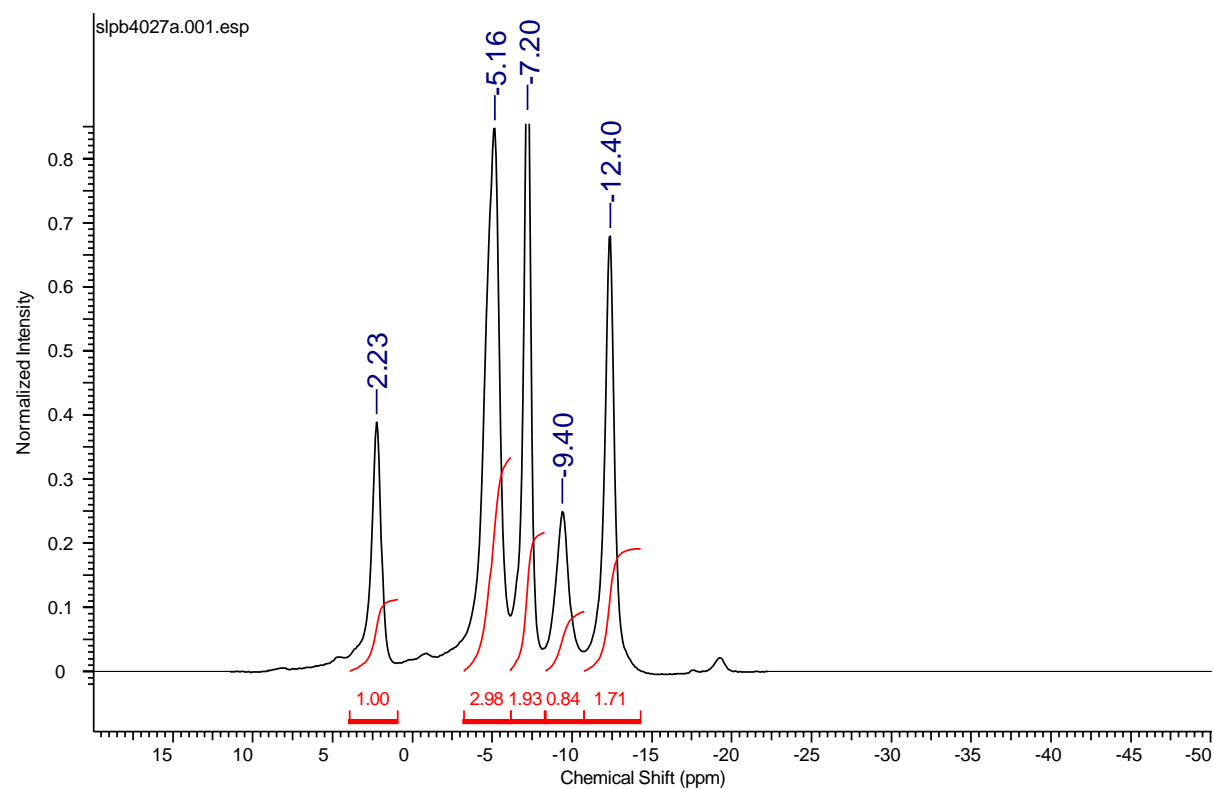

<sup>31</sup>P

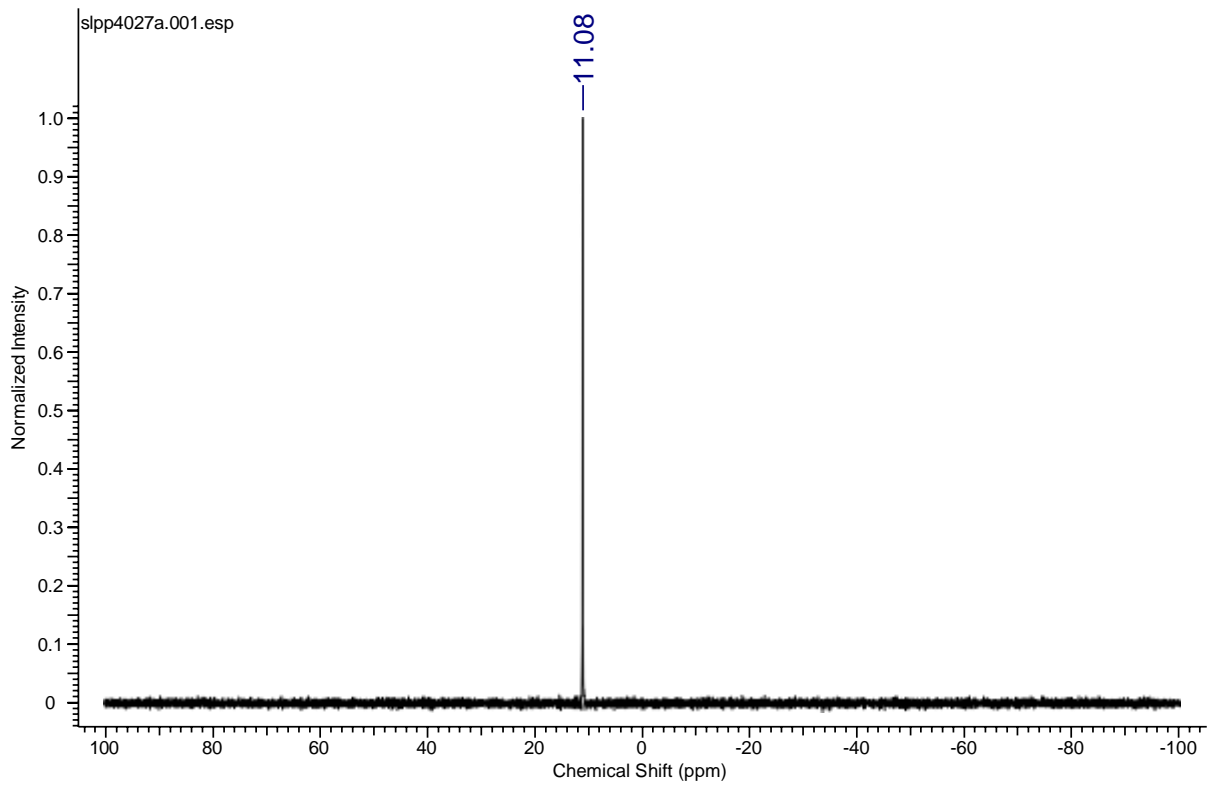

# Compound 5

$^1\text{H}$

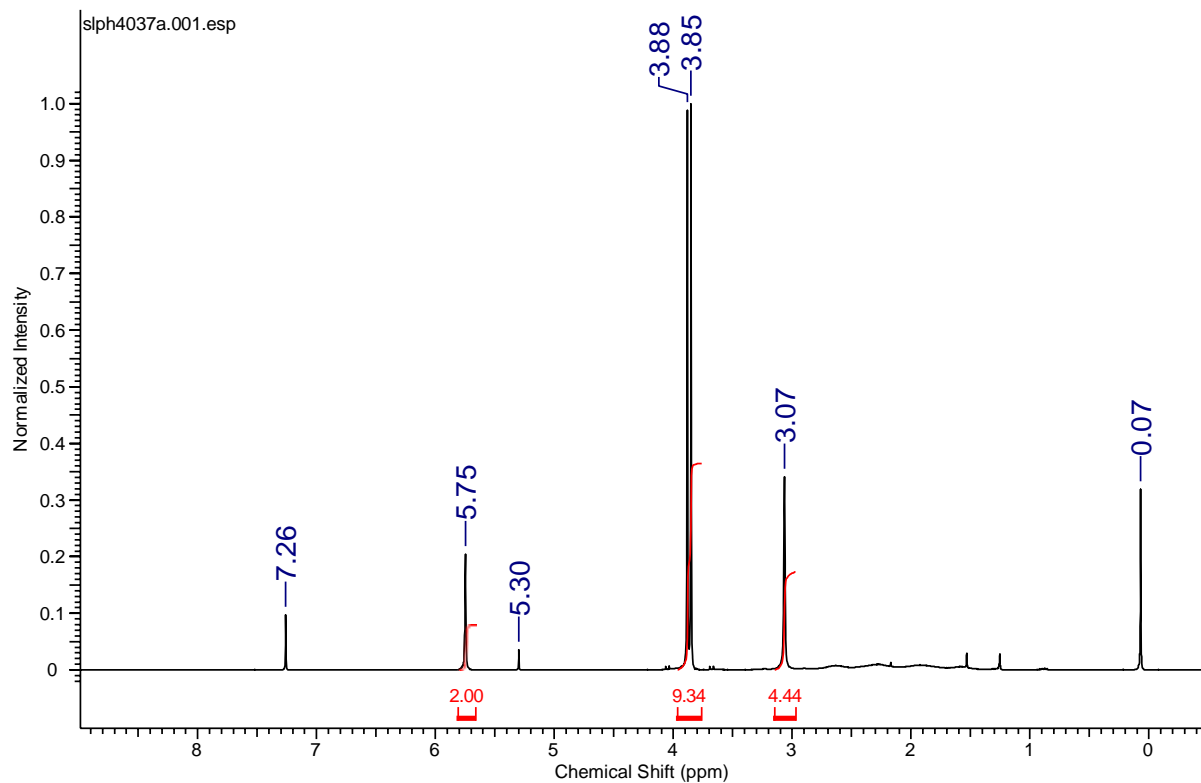

11B

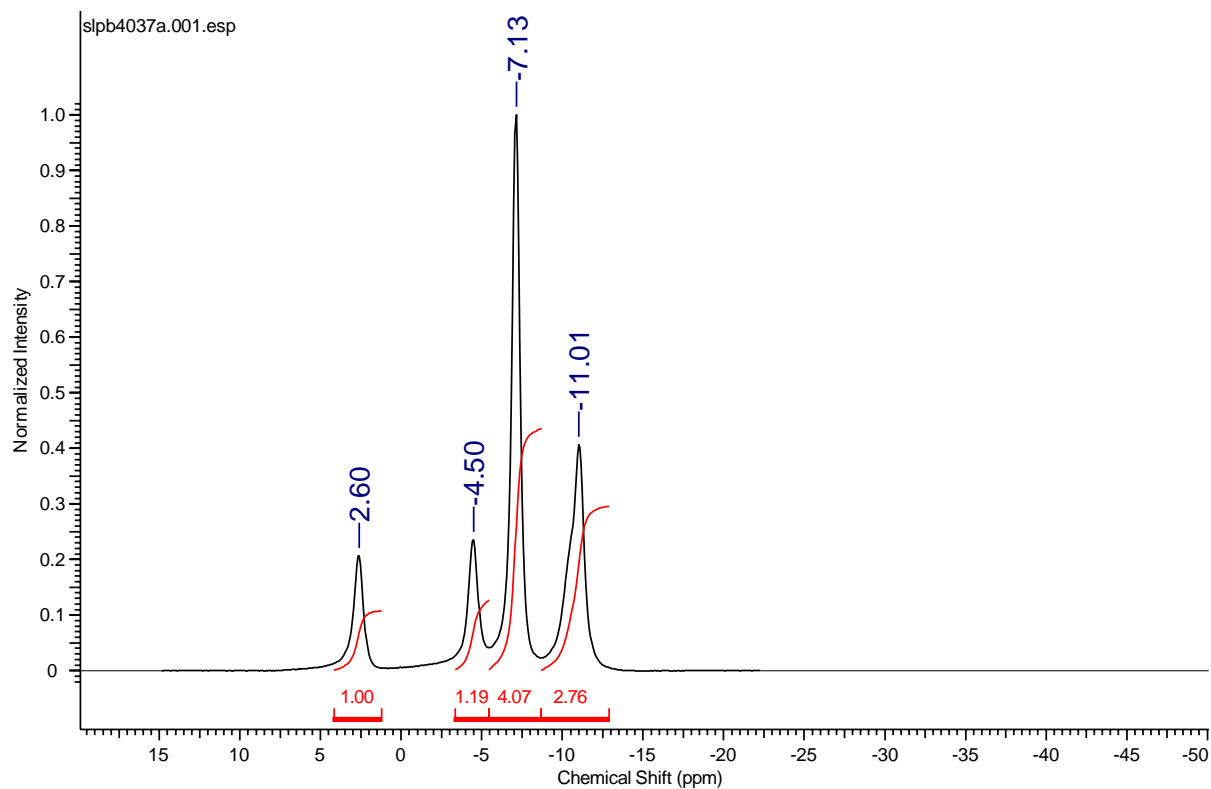

<sup>31</sup>P

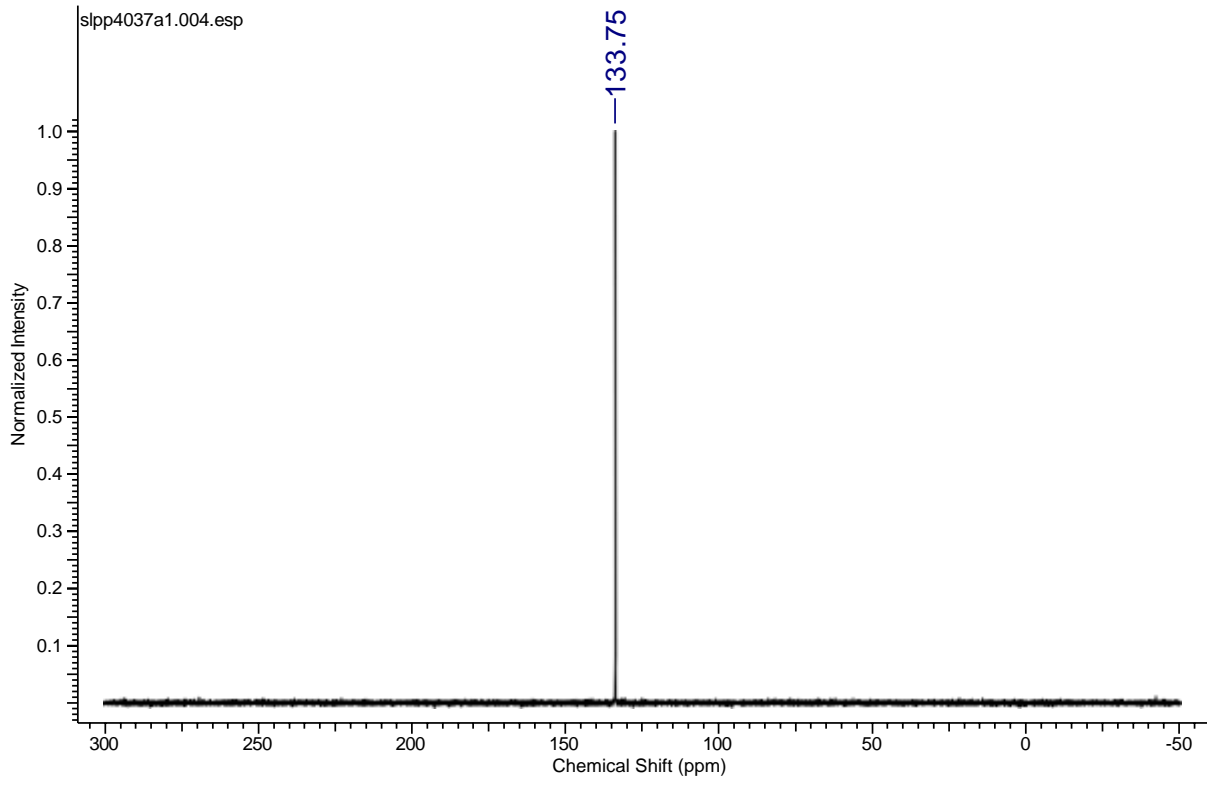



# Compound 6

$^1\text{H}$

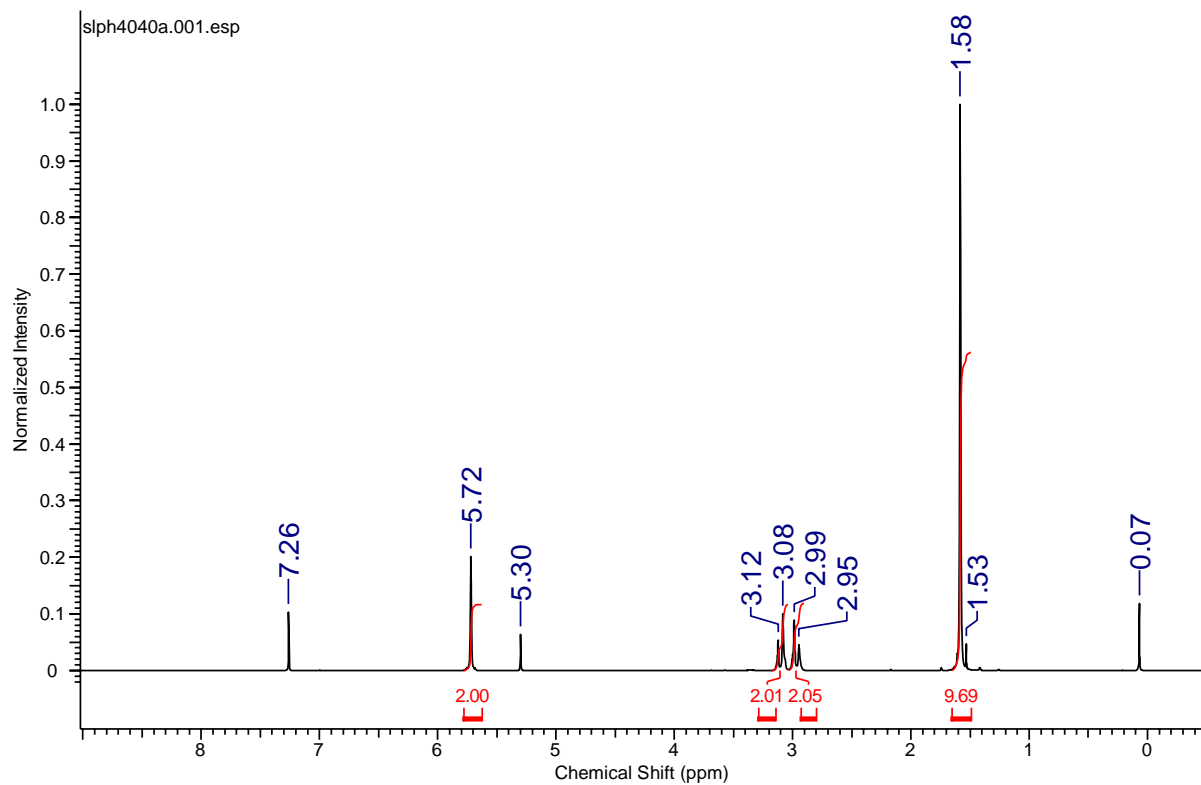

$^{11}\text{B}$

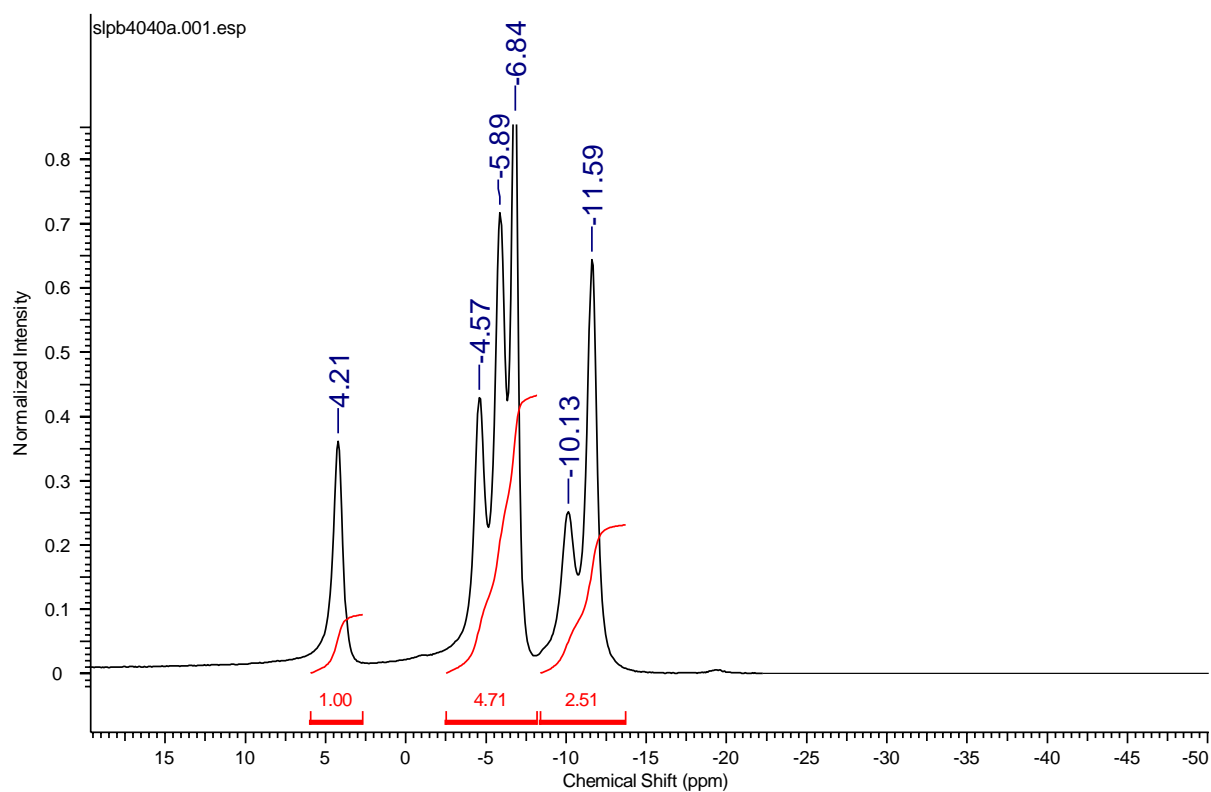

# Compound 7

<sup>1</sup>H

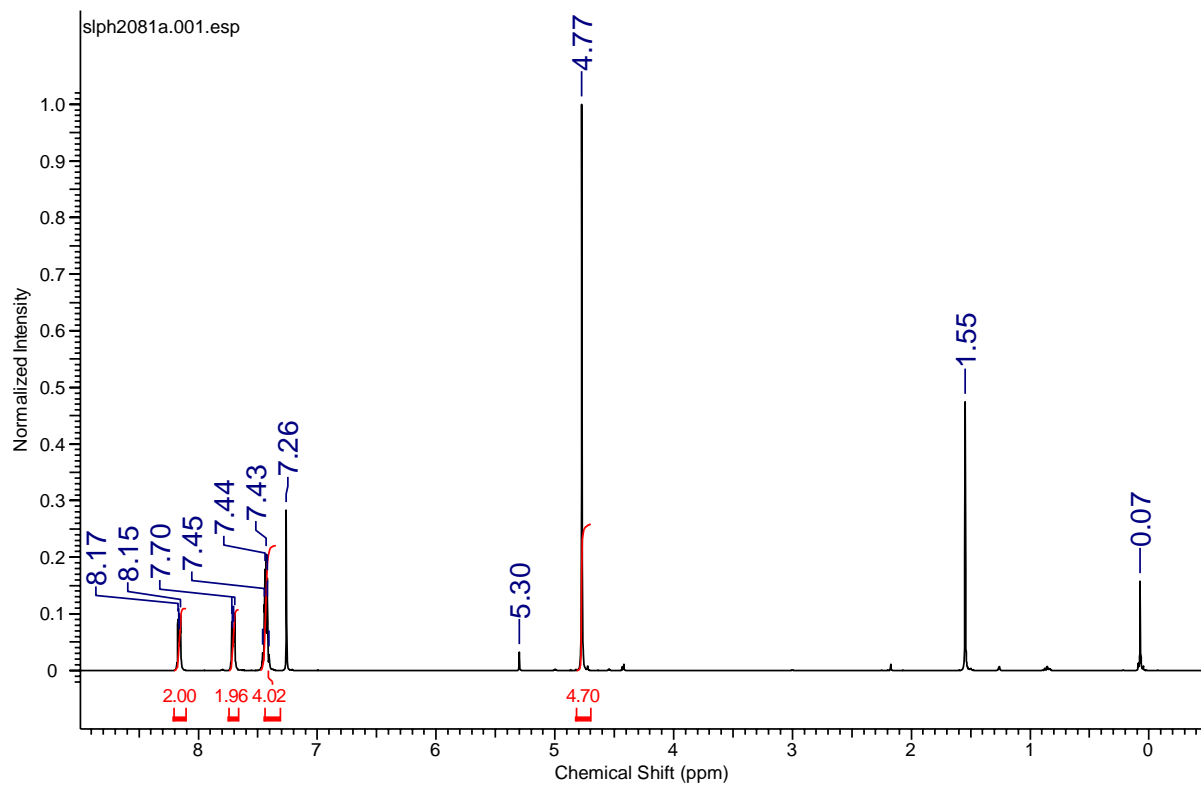

<sup>11</sup>B

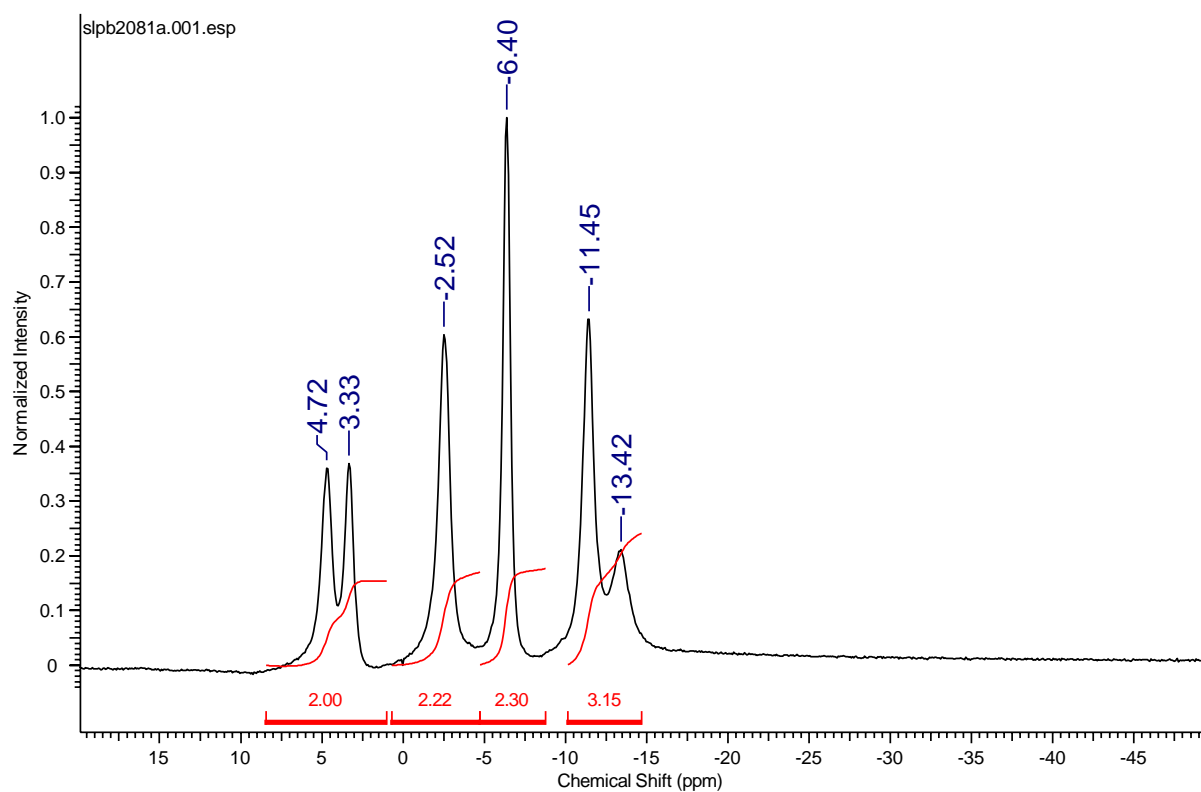

# Compound 8

$^1\text{H}$

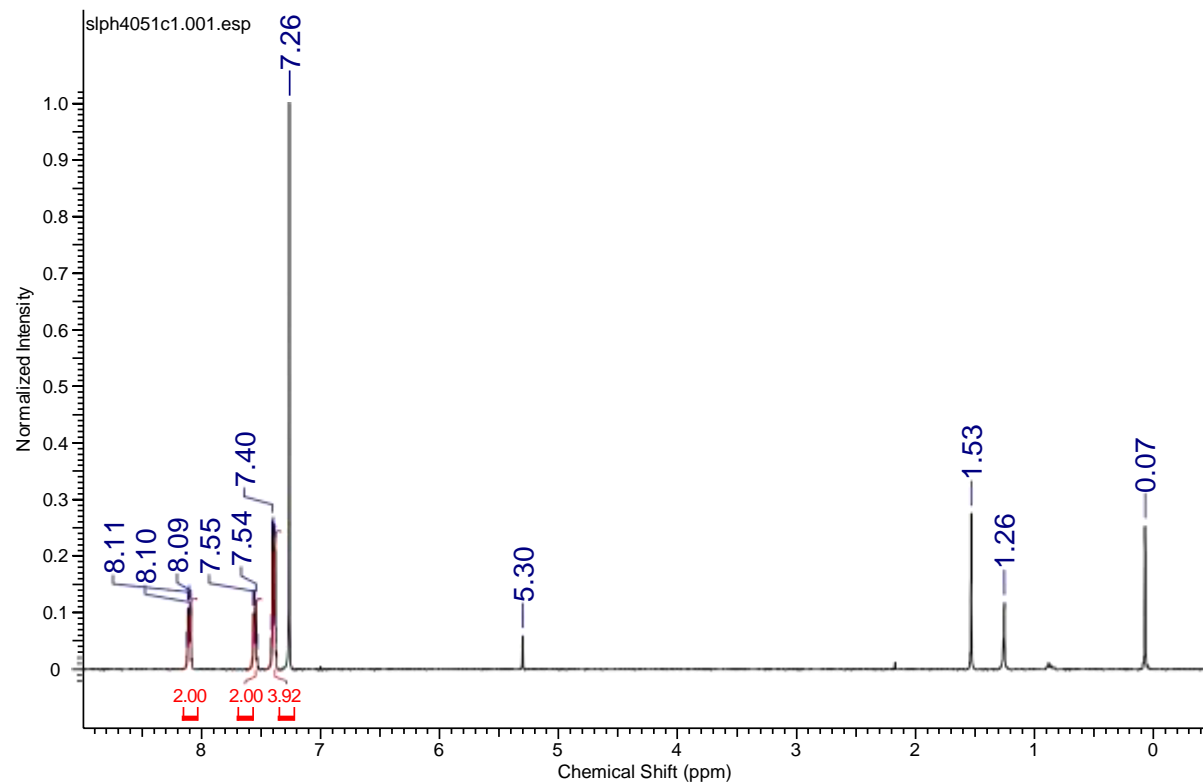

$^{11}\text{B}$

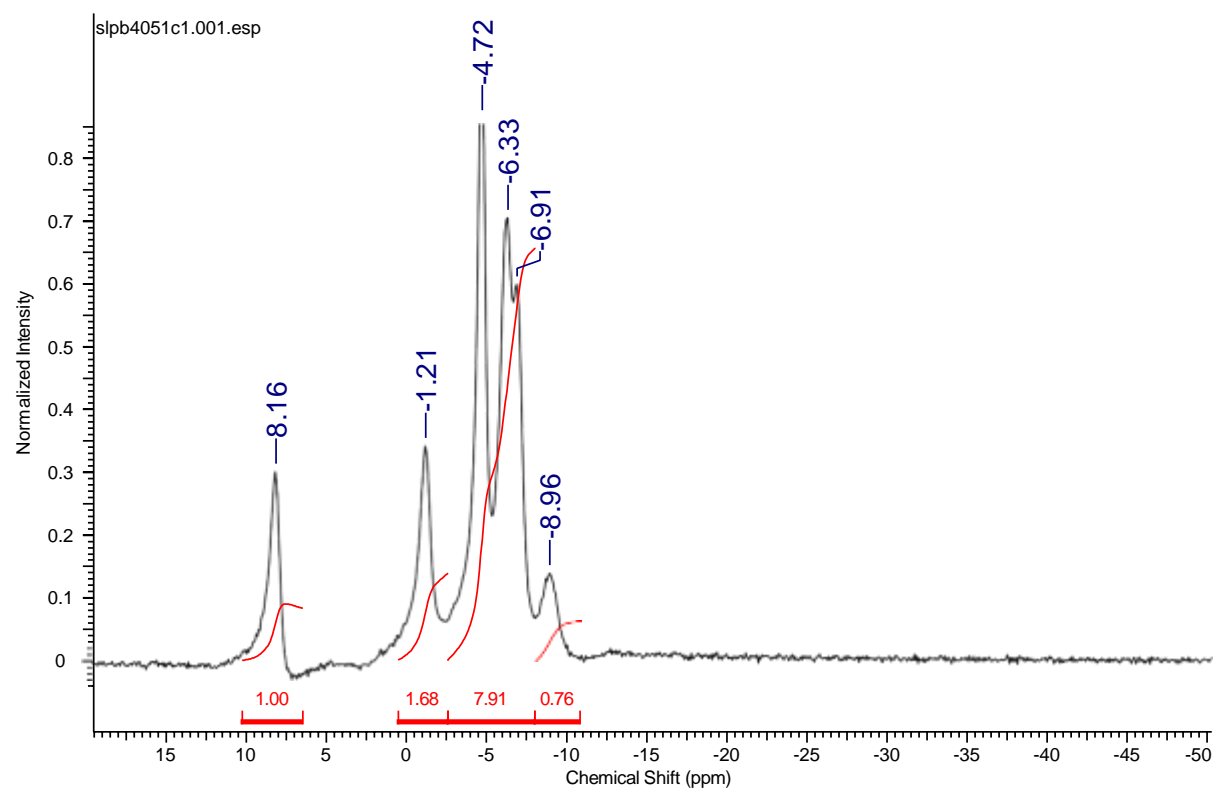

# Salt [HNMe<sub>3</sub>]<sup>IV</sup>

<sup>1</sup>H

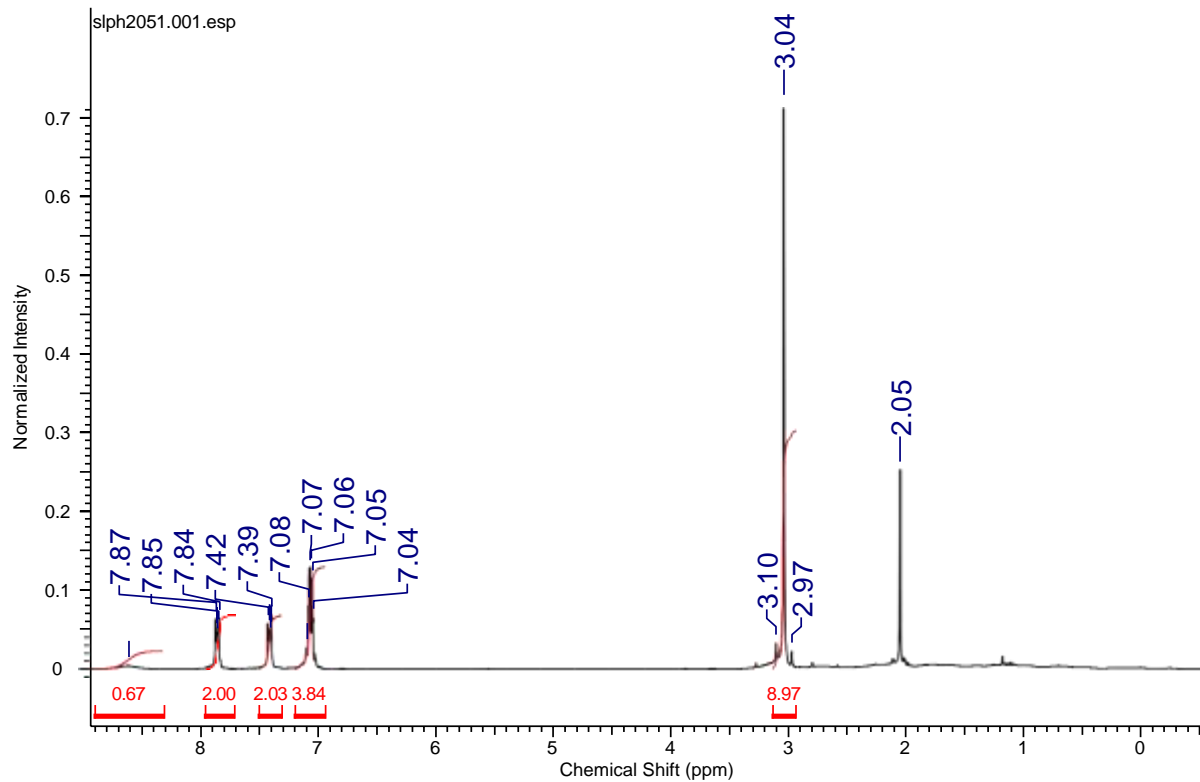

<sup>11</sup>B

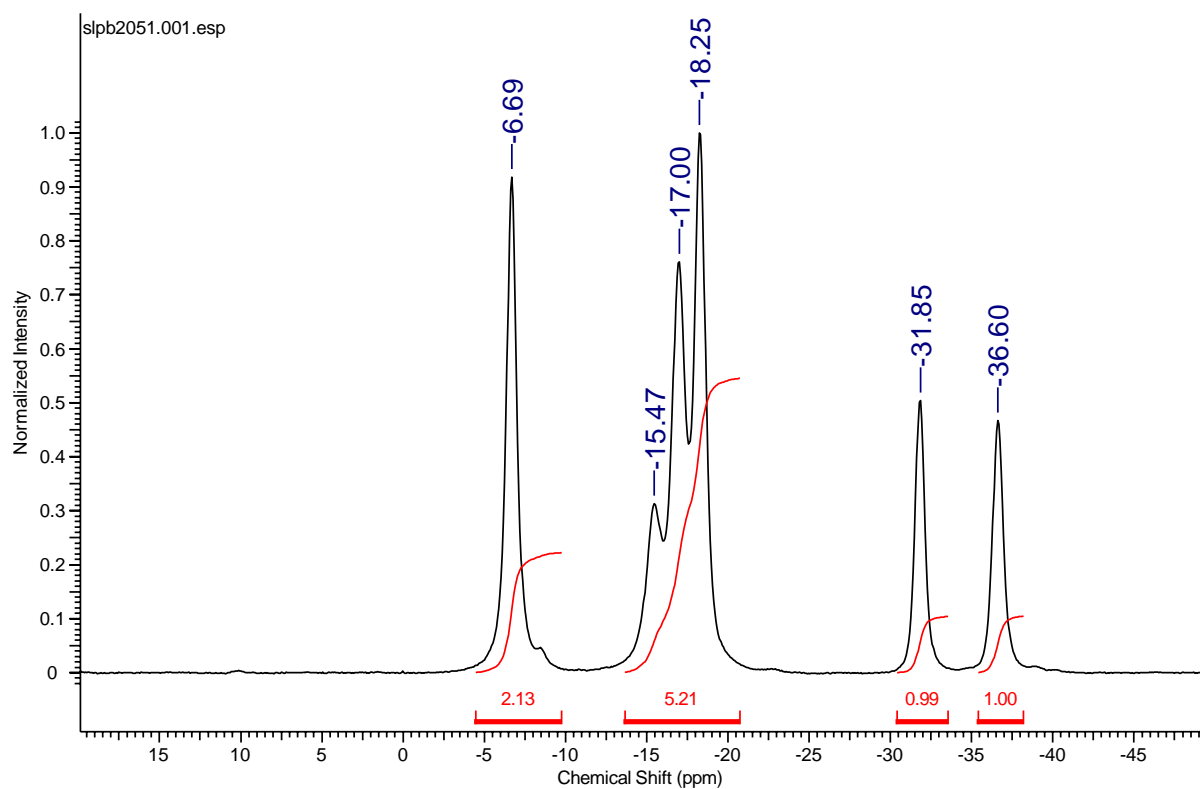

Supplement: c6dt01888b1.pdf [file c6dt01888b1.pdf]
